# Supplementary material
Source: PubMed Central journal article supplement (PMC3126592)
Supplement: supp_85_14_7169__1.pdf [file supp_85_14_7169__1.pdf]

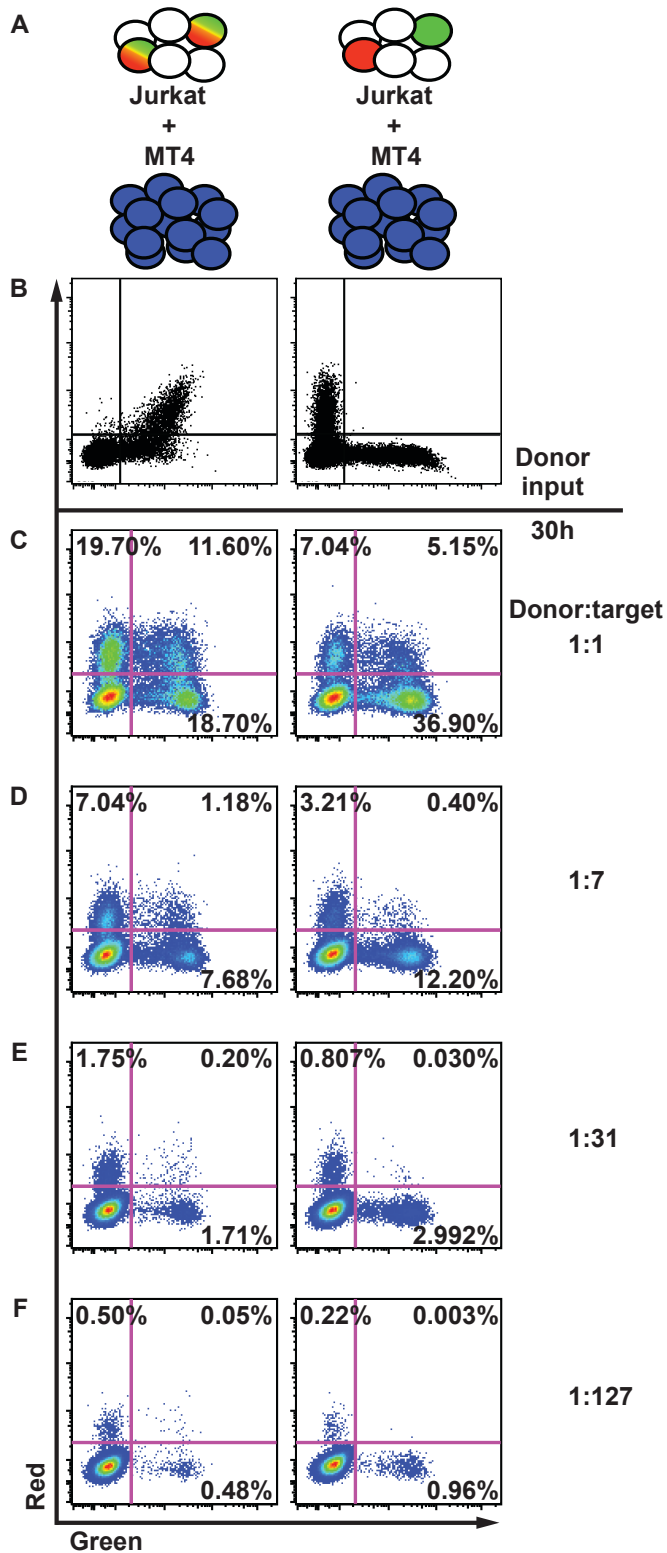

**Figure S1 (related to Figures 3A-C):**  
**Flow cytometry plots of MT4 target cells 30h after co-culture with Jurkat donor cells.** MT4 target cells infected by Jurkat donorRG cells (left) or Jurkat donorR + donorG cells (right), at different donor to target ratios. **A**, Diagram of MT4 target cells (blue) mixed with Jurkat donorRG (left) or Jurkat donorR + Jurkat donorG (right). **B**, Flow cytometry plots of transfected donor cells before mixing. **C-F**, Flow cytometry plots of target cells 30h after mixing at a donor:target cell ratio of **C**, 1:1, **D**, 1:7, **E**, 1:31, **F**, 1:127.

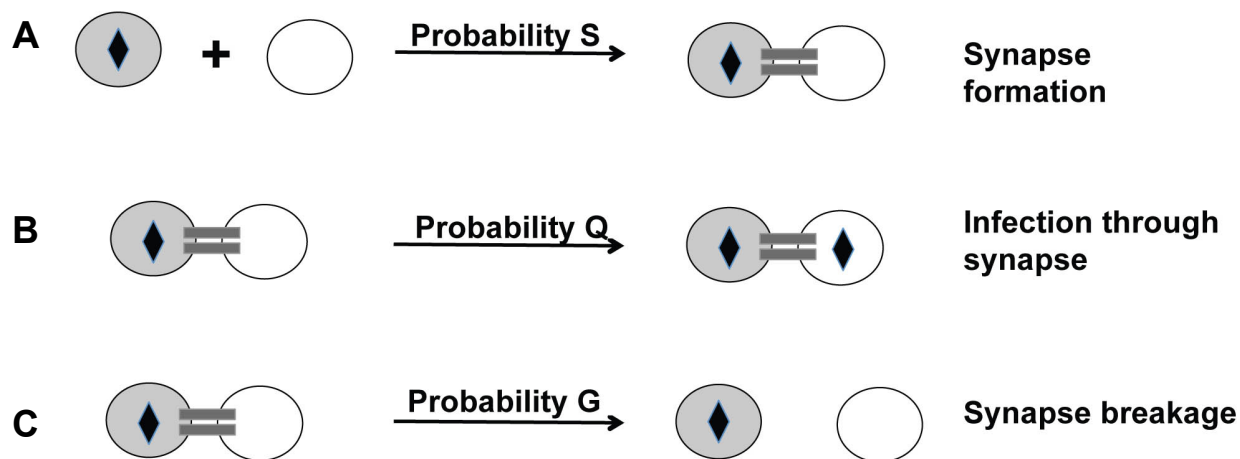

**Figure S2 (related to Figure 3D):** Schematic diagram showing the events that can occur in the computational models with their respective probabilities. **A**, An infected donor cell (grey with diamond) can form a synapse with a target cell (white) with a probability  $S$ . The target cell can be either uninfected or already infected. **B**, If cells are linked together via the synapse, the virus can be transferred from the donor cell to the target cell with a probability  $Q$ . In this picture, transfer occurs in one direction because we are concentrating on infections from the donor cell. **C**, With a probability  $G$ , a synapse can break, resulting in two uncoupled cells (see Supplementary methods for parameter details).

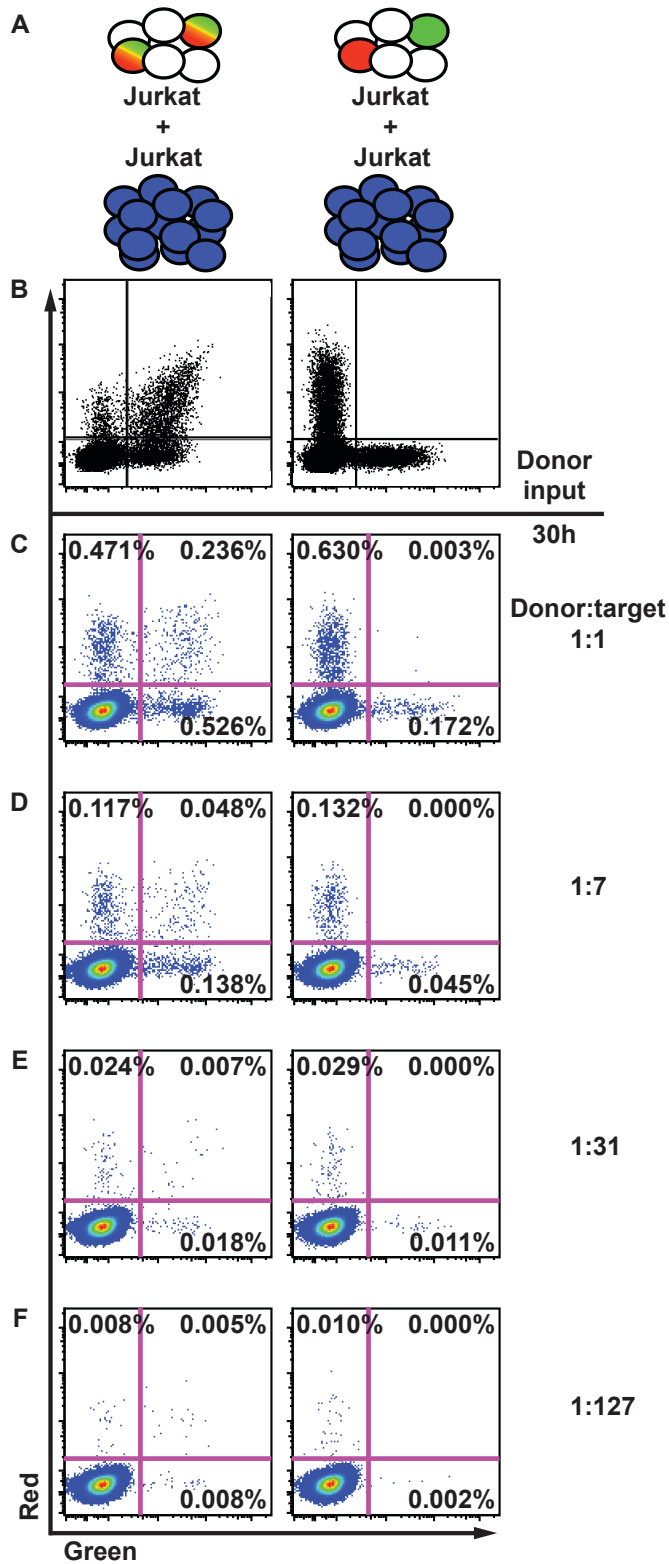

**Figure S3 (related to Figure 3E):**  
**Flow cytometry plots of Jurkat target cells 30h after co-culture with Jurkat donor cells.** Jurkat target cells infected by Jurkat donorRG cells (left) or Jurkat donorR + donorG cells (right), at different donor to target ratios. **A**, Diagram of Jurkat donorRG (left) or Jurkat donorR + Jurkat donorG (right) mixed with Jurkat target cells (blue). **B**, Flow cytometry plots of transfected donor cells before mixing. **C-F**, Flow cytometry plots of target cells 30h after mixing at a donor:target cell ratio of **C**, 1:1, **D**, 1:7, **E**, 1:31, **F**, 1:127.

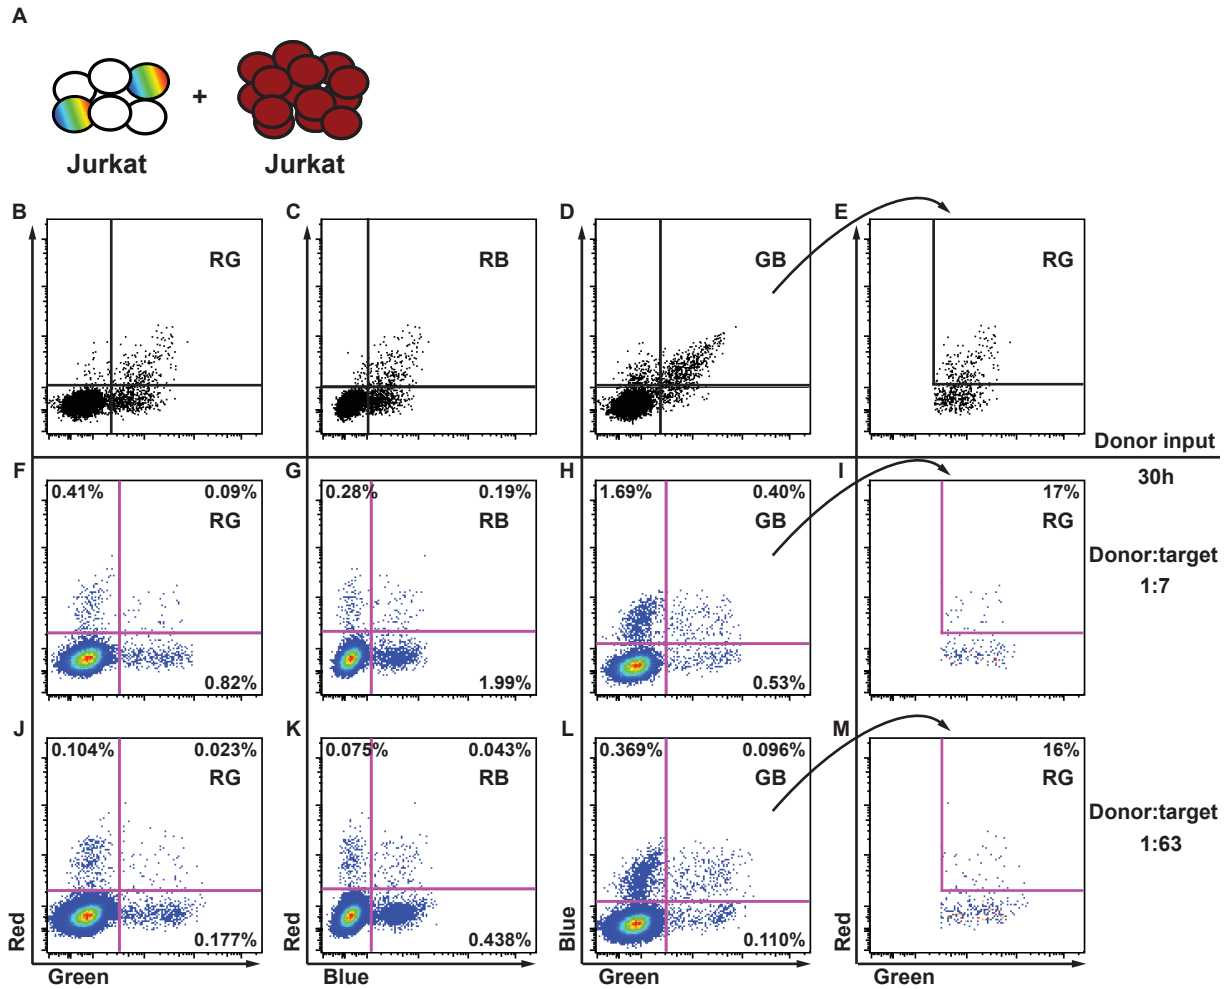

**Figure S4 (related to Figure 3F): Flow cytometry plots of Jurkat target cells 30h after co-culture with Jurkat donorRGB cells.** **A**, Diagram of Jurkat donorRGB cells mixed with Jurkat target cells (dark red). **B-E**, Flow cytometry plots of transfected Jurkat donorRGB cells before mixing. **F-M**, Flow cytometry plots of Jurkat target cells 30h after mixing with Jurkat donorRGB cells at a donor:target cell ratio of 1:7, **F-I**, and 1:63, **J-M**. Plots show target cells that are RG, **B,F,J**, RB, **C,G,K**, or BG, **D,H,L**. **E,I,M**, plots show fraction of GB cells that also express HIV (Red). Abbreviations: R = HIV (Red), G = HIV (Green), B = HIV (Blue).

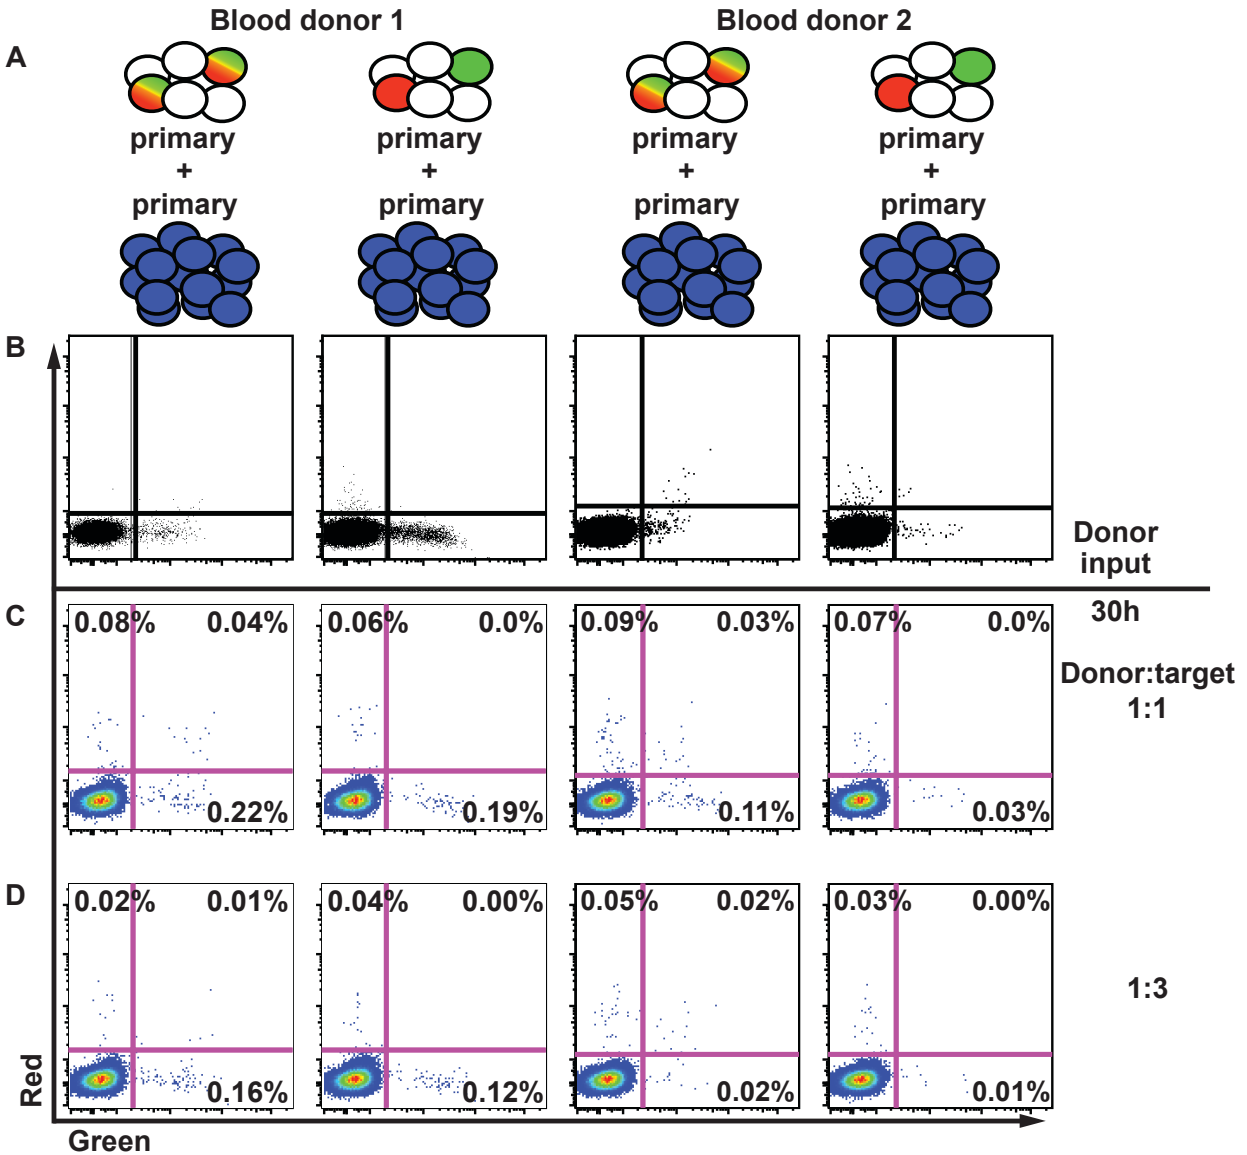

**Figure S5 (related to Figure 3G):** Flow cytometry plots of primary CD4<sup>+</sup> target T cells 30h after co-culture with autologous, primary CD4<sup>+</sup> donor T cells. Primary target cells infected by primary donorRG cells (left) or primary donorR + donorG cells (right), at different donor to target ratios. **A**, Diagram of primary donorRG (left) or primary donorR + primary donorG (right) mixed with primary target cells (blue). **B**, Flow cytometry plots of transfected donor cells before mixing. **C and D**, Flow cytometry plots of target cells 30h after mixing at a donor:target cell ratio of **C**, 1:1 and **D**, 1:3.
